# Supplementary material
Source: MDPI journal article supplement (https://www.mdpi.com/2039-4713/14/1/4)
Supplement: s1 [file s1]

# Microbial Removal of Heavy Metals from Contaminated Environments Using Metal-Resistant Indigenous Strains

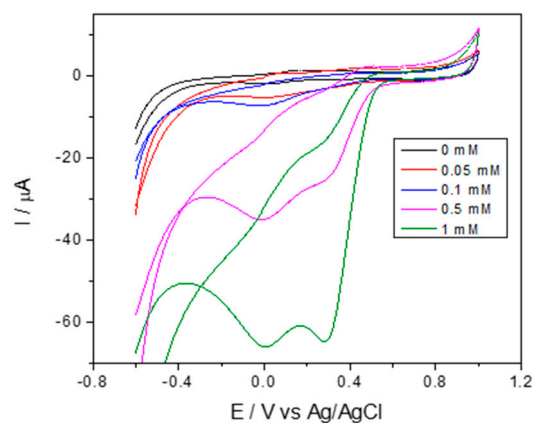

**Figure S1.** Cyclic voltammograms recorded on the surface of the PB/SPE sensor: in the absence and in the presence of  $\text{Cr}^{6+}$  at different concentrations (0.1 M KCl + 0.1 M HCl,  $v = 0.1$  V/s).

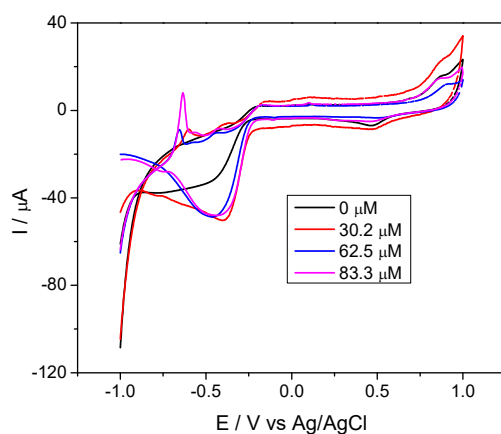

**Figure S2.** Cyclic voltammograms recorded at the surface of the AuNPs/CS/SPEs sensor in the absence and in the presence of  $\text{Pb}^{2+}$  at different concentrations (Tris-HCl buffer 0.1 M, pH 5,  $v = 0.1$  V/s).

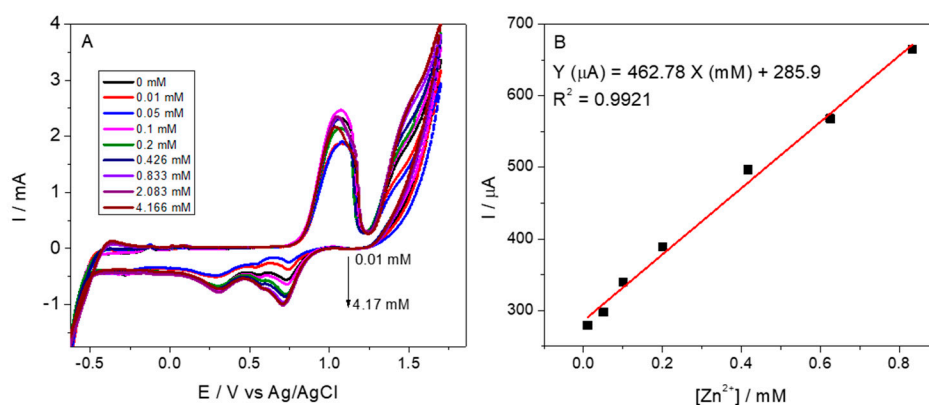

**Figure S3.** Detection of  $\text{Zn}^{2+}$  using the MWCNTs-CS/PB/AuSPE sensor in cyclic voltammetry: (A) Voltammograms obtained in the electrolyte solution in the absence and in the presence of different concentrations of  $\text{Zn}^{2+}$  ( $v = 0.1 \text{ V/s}$ ); (B) Calibration curve for the variation of the reduction peak current in cyclic voltammetry vs. concentration of  $\text{Zn}^{2+}$ .

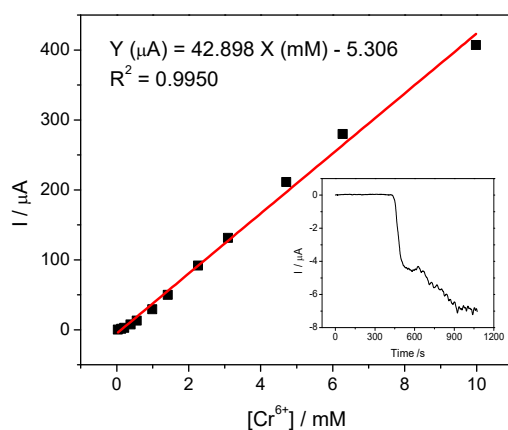

**Figure S4.** Calibration curve obtained for  $\text{Cr}^{6+}$  ion detection using the PB/SPE sensor (applied potential 0.3 V vs. Ag/AgCl, 0.1 M KCl + 0.1 M HCl). Inset: Representation of current intensity dependence on  $\text{Cr}^{6+}$  concentration.

**Table S1.** Optimization of the working potential and the performance parameters for the amperometric detection of  $\text{Cr}^{6+}$  using Prussian Blue modified SPEs (0.1 M KCl + 0.1 M HCl).

| E (V) | Linear Range (mM) | $R^2$ | Sensitivity ( $\mu\text{A}/\text{mM}$ ) | LOD ( $\mu\text{M}$ ) | Specific sensitivity ( $\text{mA}\cdot\text{M}^{-1}\cdot\text{cm}^{-2}$ ) |
|-------|-------------------|-------|-----------------------------------------|-----------------------|---------------------------------------------------------------------------|
| 0.28  |                   | 0.998 | 39.10                                   | 0.61                  | 311.32                                                                    |
| 0.3   | 0.035-13.413      | 0.995 | 42.90                                   | 0.56                  | 341.54                                                                    |
| 0.33  |                   | 0.999 | 36.66                                   | 0.82                  | 291.89                                                                    |

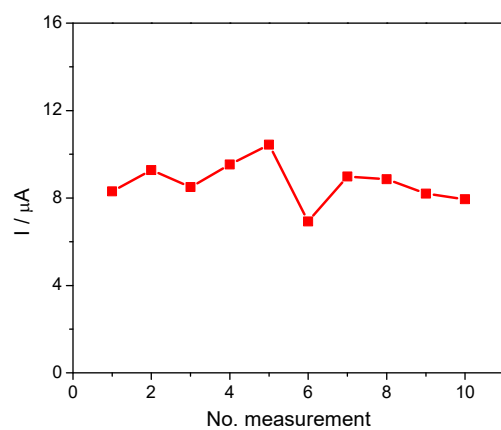

**Figure S5.** Stability of sensors modified with Prussian Blue for the determination of 1 mM  $\text{Cr}^{6+}$ .

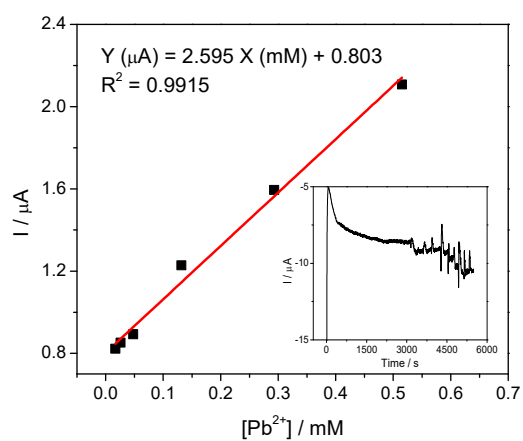

**Figure S6.** Amperometric detection of  $\text{Pb}^{2+}$  ion using AuNPs-CS/SPE sensor ( $E = -0.45 \text{ V}$  vs.  $\text{Ag}/\text{AgCl}$ , 0.1 M Tris-HCl, pH 5). Inset: Representation of current intensity dependence on  $\text{Pb}^{2+}$  concentration.

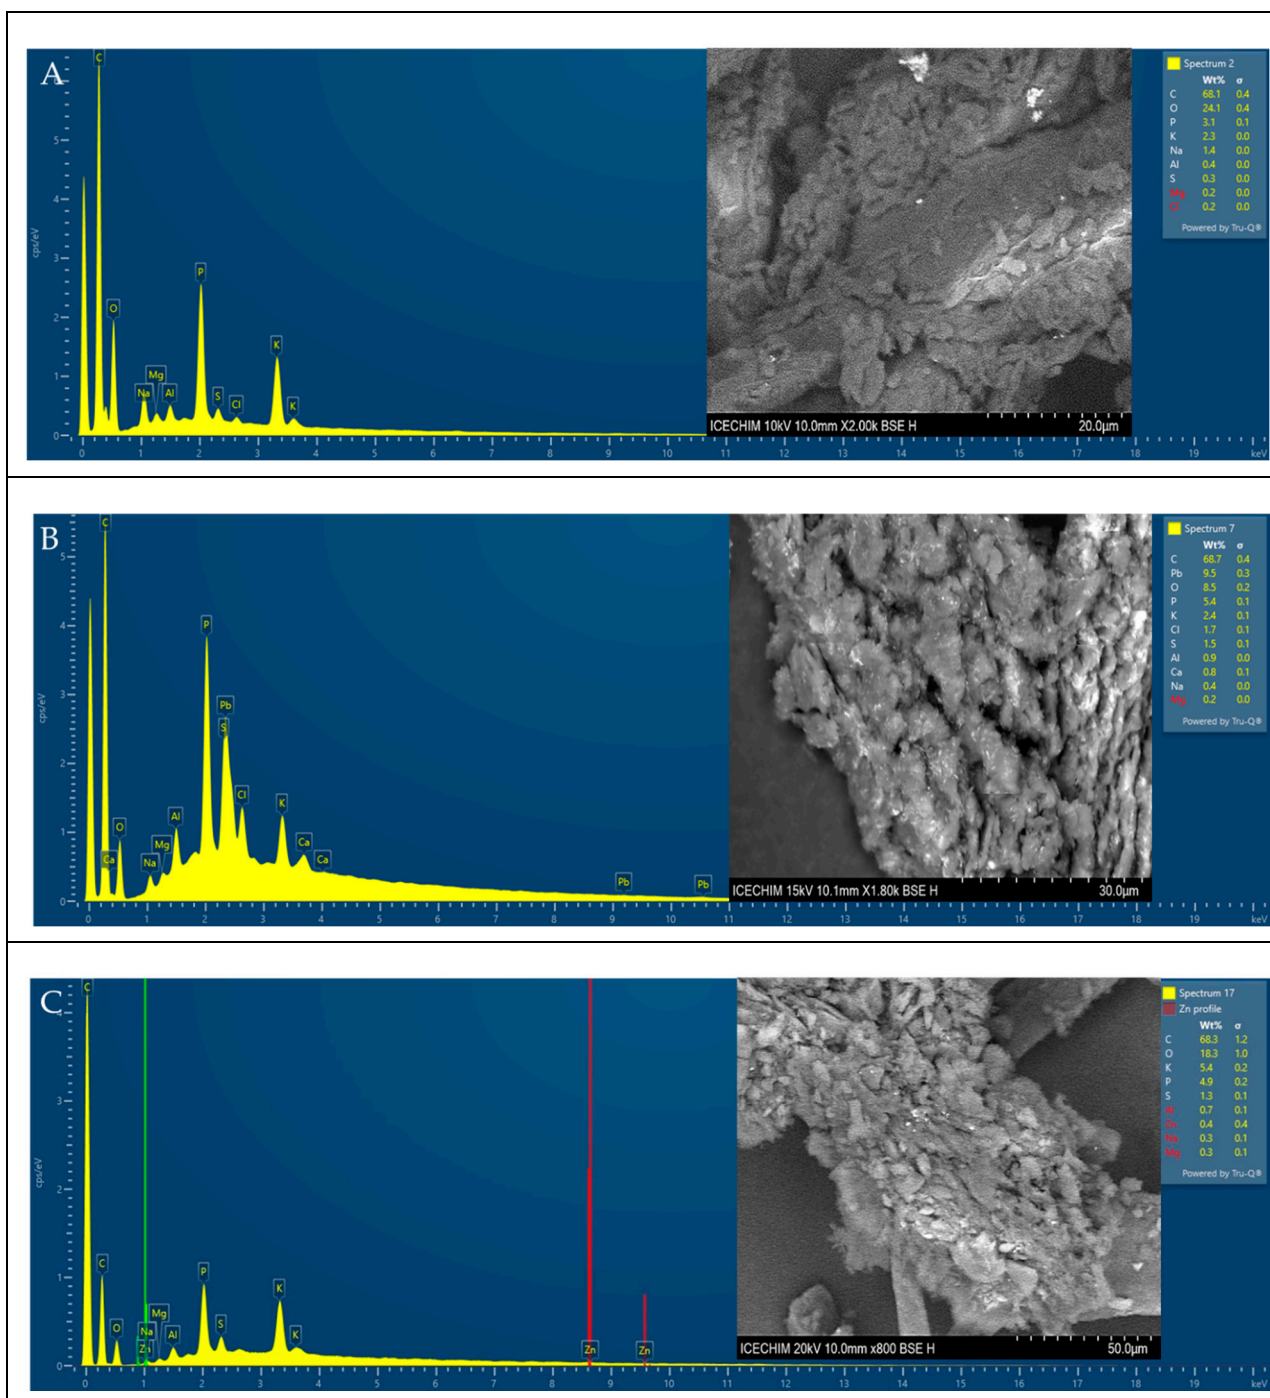

**Figure S7.** Scanning electron micrographs (SEM) and EDX spectra of *Bacillus marisflavi* biomass A) control, B) Pb treated, C) Zn treated.

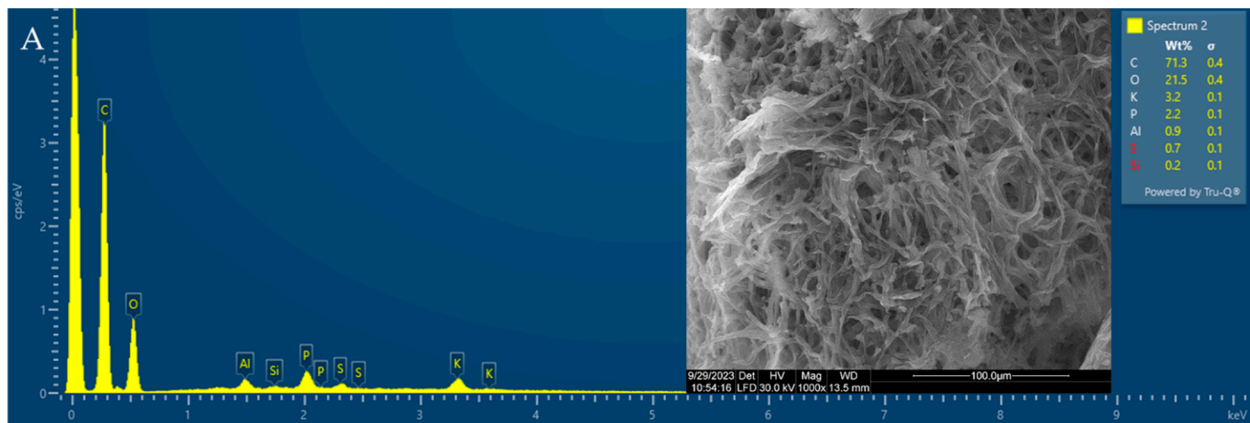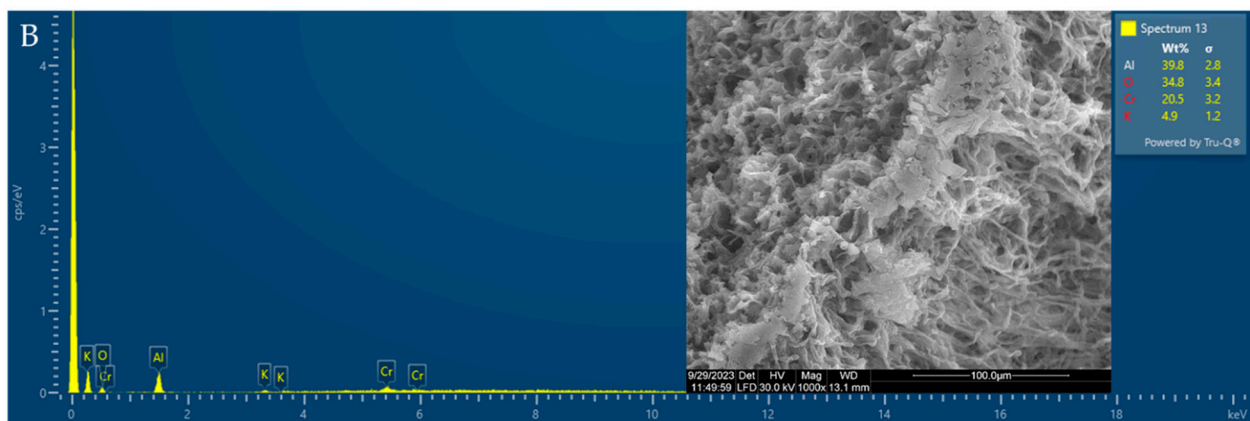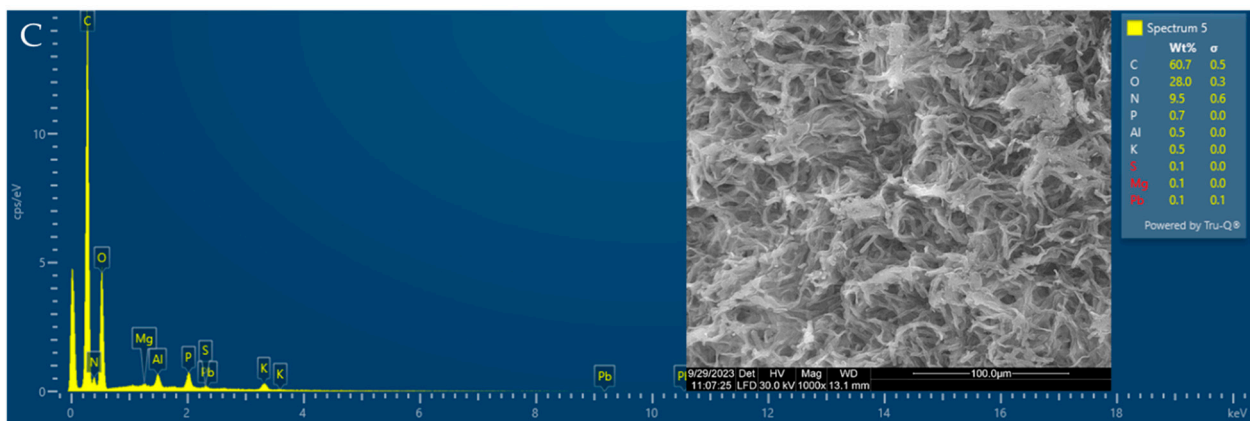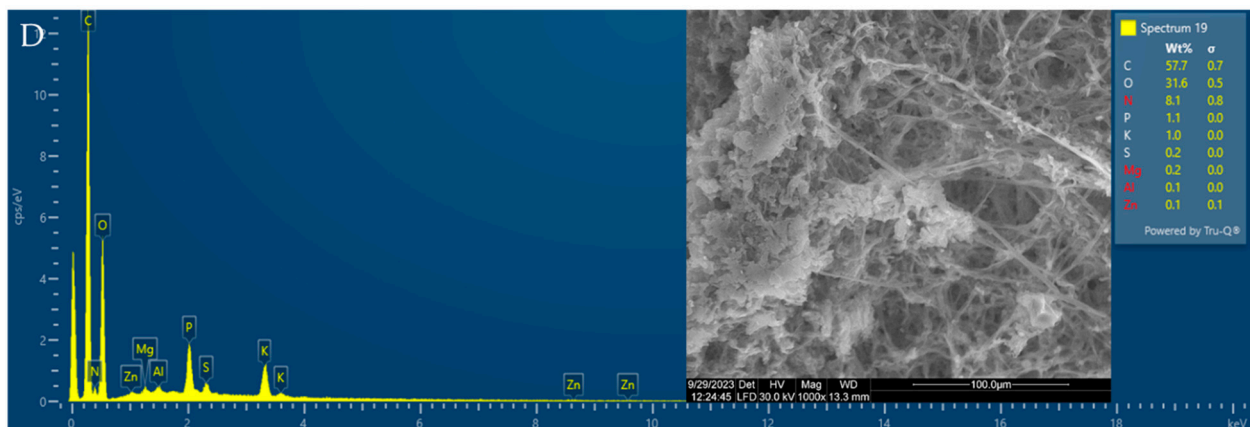

**Figure S8.** Scanning electron micrographs (SEM) and EDX spectra of *Trichoderma longibrachiatum* biomass A) control, B) Cr treated, C) Pb treated, D) Zn treated.

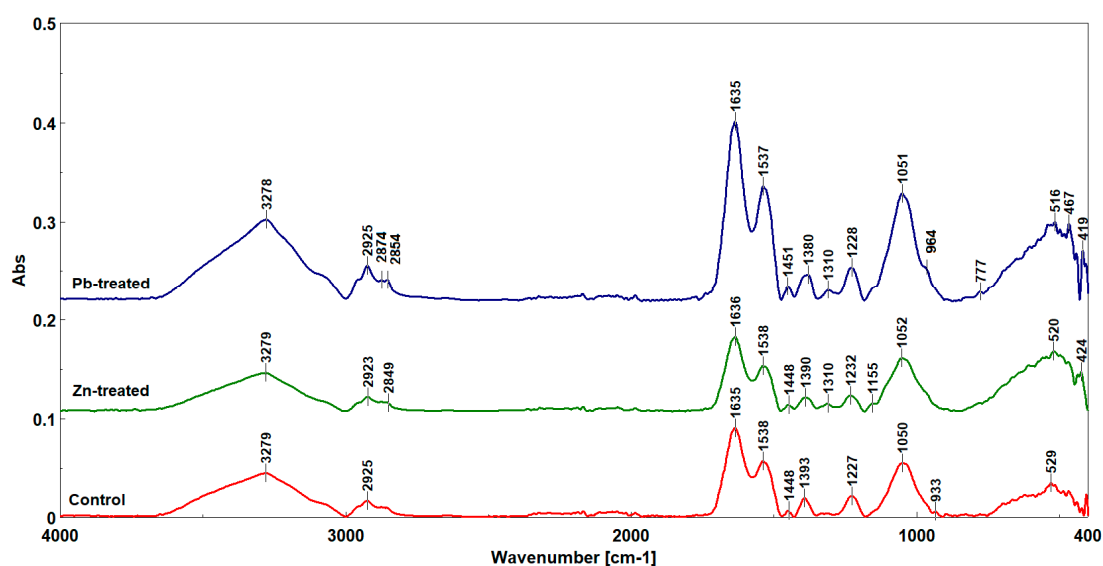

**Figure S9.** Fourier transform infrared spectroscopy spectra of *Bacillus marisflavi* biomass before and after treatment with Pb (NO<sub>3</sub>)<sub>2</sub> and ZnSO<sub>4</sub>.

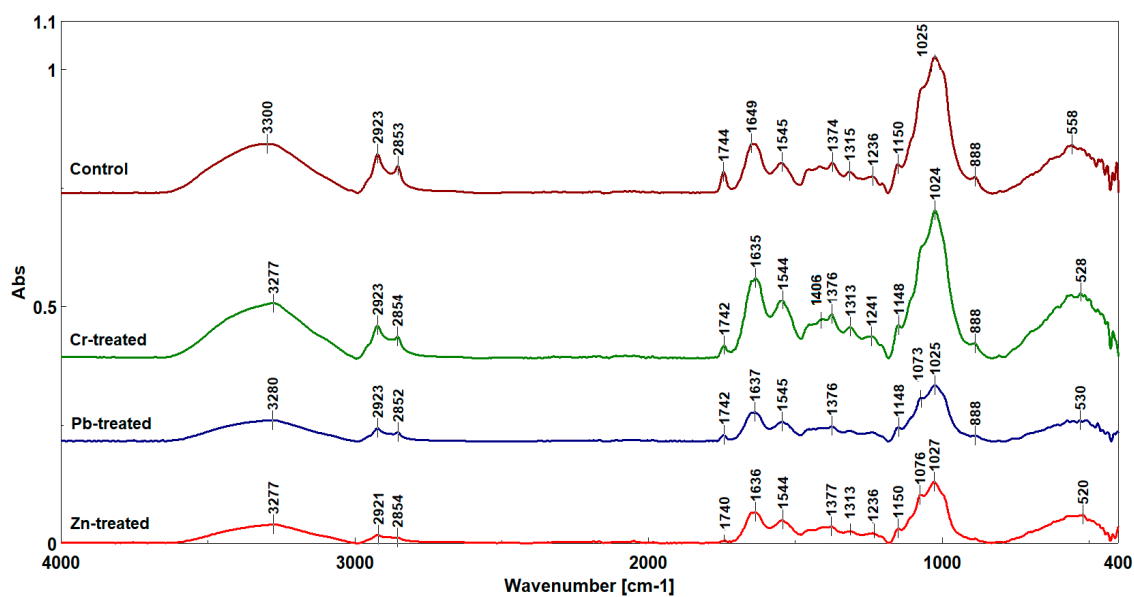

**Figure S10.** Fourier transform infrared spectroscopy spectra of *Trichoderma longibrachiatum* biomass before and after treatment with K<sub>2</sub>Cr<sub>2</sub>O<sub>7</sub>, Pb (NO<sub>3</sub>)<sub>2</sub> and ZnSO<sub>4</sub>.
